# Supplementary material
Source: PubMed Central journal article supplement (PMC4214523)

**Suppl. Fig. 1:** Protein-protein interaction network of the annotated connecting genes from the CKDGen pathway network (*Fig. 3*).

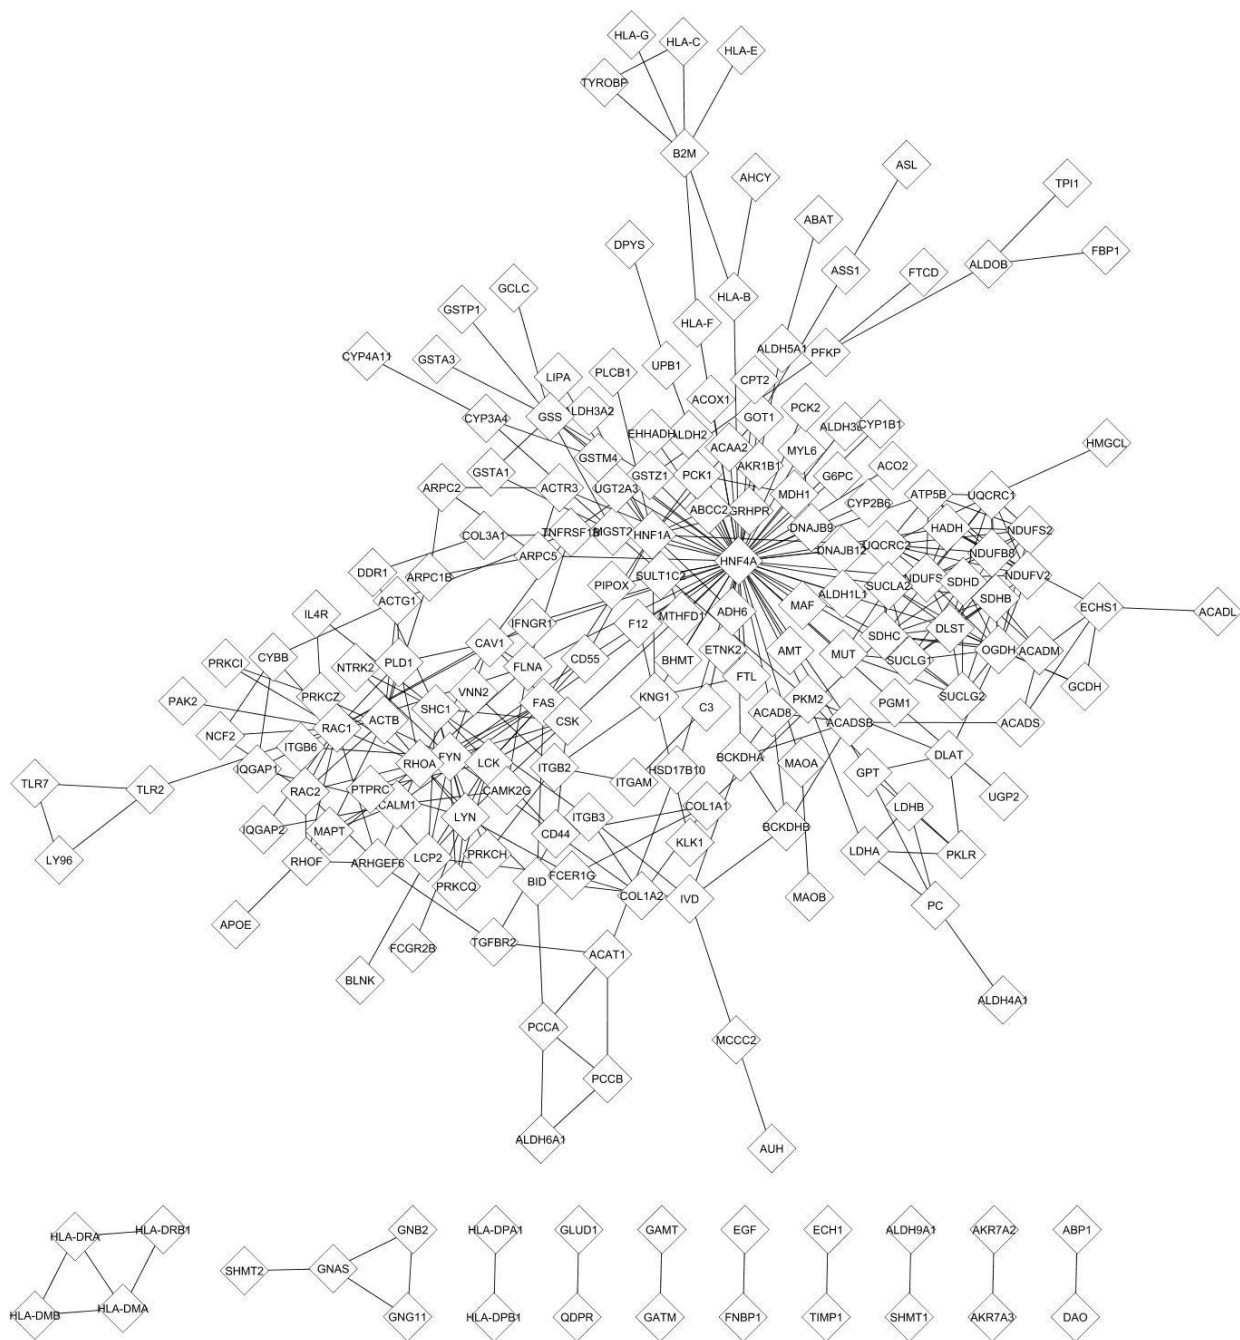

**Suppl. Fig. 2:** Differential expression for individual diseases mapped to the CKD-associated pathway network graph. Blue nodes in **A** to **G** indicate pathways that are enriched among differentially regulated genes (disease vs. living donor controls). For **H**, Green nodes represent the 78 pathways that were recapitulated in an independent CKD cohort applying the identical strategy steps.

**A) FSGS**

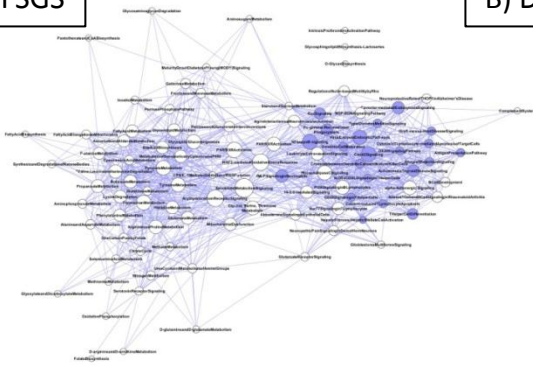

**B) DN**

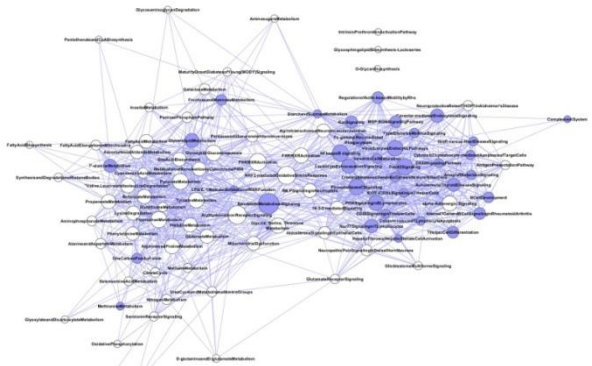

**C) HTN**

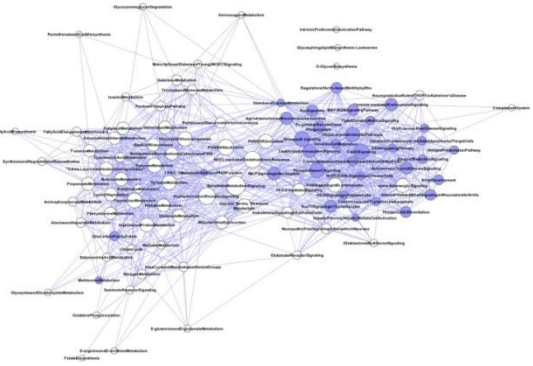

**D) IgAN**

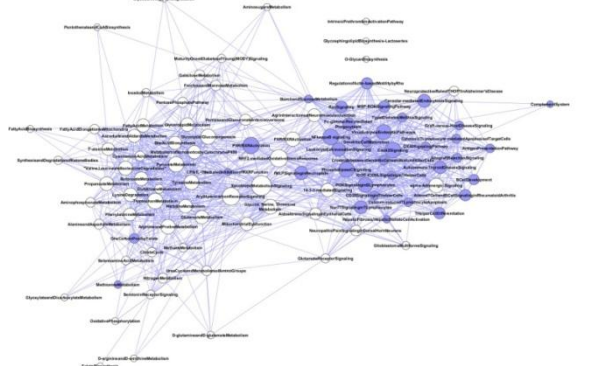

**E) MCD**

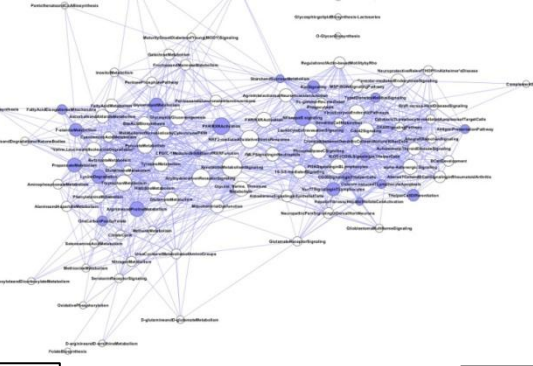

**F) MGN**

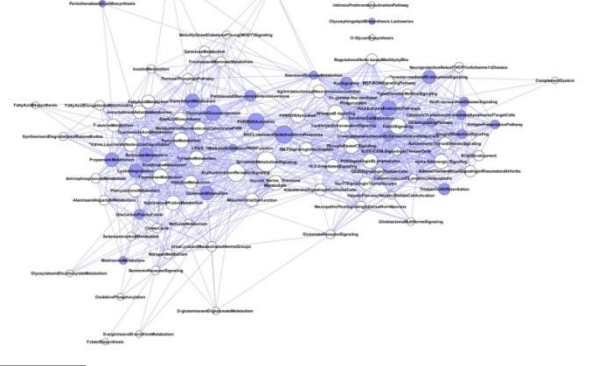

**G) LN**

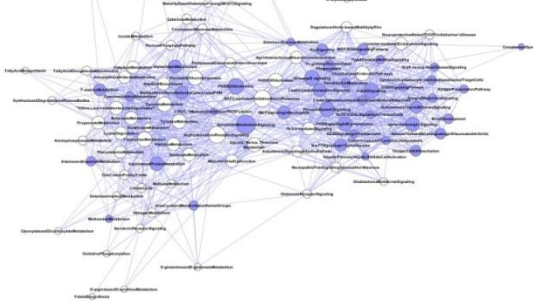

**H) Validation**

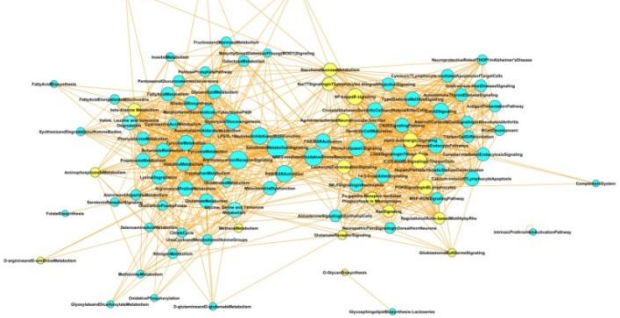

Supplement: ASN.2013080906_ASN2013080906SupplementaryData2.pdf [file ASN.2013080906_ASN2013080906SupplementaryData2.pdf]
